# Supplementary material for: Application of the dissociative electron transfer theory and its extension to the case of in-cage interactions in the electrochemical reduction of arenesulfonyl chlorides
Source: Royal Society of Chemistry journal article supplement (doi:10.1039/c1cp22130b), 2011-09-14
Supplement: c1cp22130b.pdf [file c1cp22130b.pdf]

## **Supporting Information**

# **Auto-Catalytic Mechanism and Radical/Ion Pair Formation in the Electrochemical Reduction of Arene Sulfonyl Chlorides**

Abdelaziz Houmam\* and Emad M. Hamed

Electrochemical Technology Center, Department of Chemistry, University of Guelph, Guelph,  
Ontario, Canada N1G 2W1

## **Table of Content**

**I- Chemicals**

**II- Electrochemical data**

**III- Computational calculations**

## I- Chemicals

Synthesis of diphenyl disulfone (**3c**):

120 mg of sodium phenyl sulfinate, dissolved in minimum amount of methanol, and 100 mg of phenyl sulfonyl chloride were mixed in 5 ml of freshly distilled acetonitrile. The solution was stirred at room temperature and the reaction was monitored by HPLC. After completion, the solvent was evaporated under reduced pressure, the residue was washed several times with chloroform, and then filtered. The combined mother liquor was dried under reduced pressure to afford a solid. The obtained solid was washed several times with minimum amounts of methanol, and then left to dry to give white solid, mp =191-193 °C. m/z (%): 282 (M<sup>+</sup>, 9.0), 250 (20), 141 (30), 125 (80), 109 (46), 77 (100). <sup>1</sup>H- NMR (CD<sub>3</sub>CN, 400 MHz); δ 7.89 (2H, *tt*, *J*= 1.2, 7.6 Hz); 7.78 (4H, *dt*, *J*= 1.2, 7.2 Hz); 7.66 (4H, *td*, *J*= 1.2, 7.6 Hz). <sup>13</sup>C NMR (CD<sub>3</sub>CN, 600 MHz); 131.14, 131.96, 132.11, 138.06.

## II- Electrochemical data

I-1. Cyclic voltammetry of 4-methoxyphenyl sulfonyl chloride (**1a**):

This is a typical cyclic voltammogram of the studied substituted sulfonyl chlorides showing the oxidation of the generated sulfinate anion (4-methoxyphenyl sulfinate in this example at *E*<sub>p</sub> = 0.43 V/SCE) and of the chloride anion at *E*<sub>p</sub> = 1.16 V/SCE.

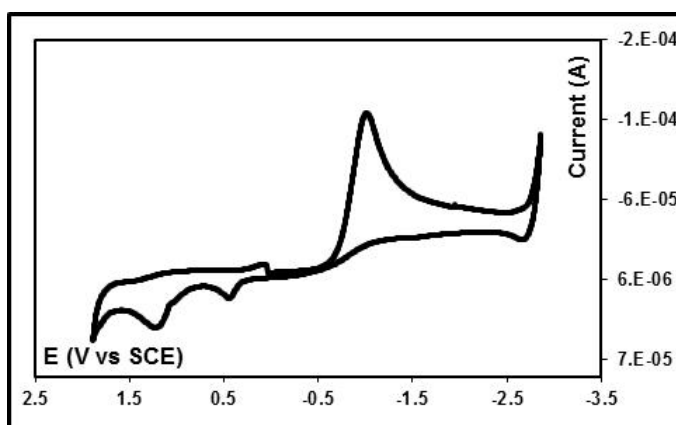

**Figure S1.** Cyclic voltammogram of 4-methoxyphenyl sulfonyl chloride, **1a**, (6.0 mM), in acetonitrile containing 0.10 M Bu<sub>4</sub>NPF<sub>6</sub>.

## II-2. Cyclic voltammetry of 4-cynaophenyl sulfonyl chloride (**1f**):

Figure S2 shows the complete cyclic voltammograms of 4-cyanophenyl sulfonyl chloride at three different scan rates 0.2, 1.2 and 5V/s. At low scan rate two reversible reduction peaks are observed at  $E^0_1 = -2.185$  V and  $E^0_2 = -2.3$  V vs SCE corresponding to the sulfinic acid and sulfinate anion, respectively. The sulfinic acid is obtained through protonation of the anion and/or hydrogen abstraction by the sulfinyl radical. Increasing the scan rate, the first reversible peak gradually decreases at the expense of the second one as seen on Figure S2b, at 1.2 V/s. At 5V/s only one reversible peak corresponding to the reversible reduction of the sulfinate anion is observed, as at this time scale the sulfinic acid is not formed.

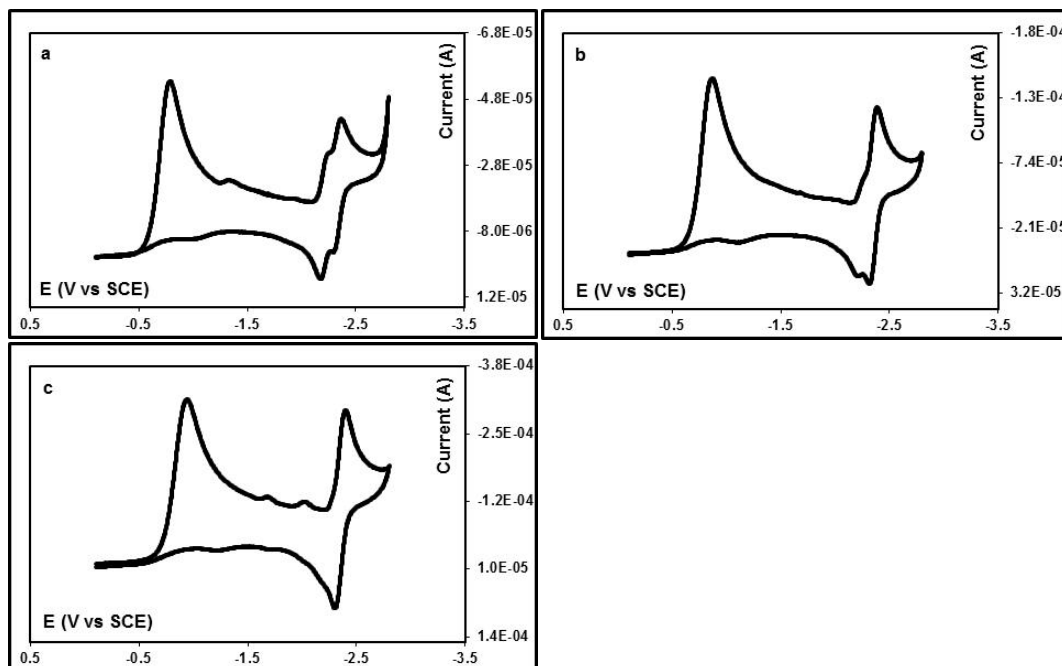

**Figure S2.** Cyclic voltammogram of 4-cyanophenyl sulfonyl chloride, **1f**, (2.03 mM) in  $\text{CH}_3\text{CN}/\text{Bu}_4\text{NPF}_6$  (0.1M) at (a)  $v = 0.2$  V/s; (b)  $v = 1.2$  V/s; and (c)  $v = 5.0$  V/s.

### II-3. Cyclic voltammetry of compounds **1c-3c**.

Figure S3a shows the cyclic voltammetry of PhSO<sub>2</sub>Cl (**1c**) in acetonitrile in the presence of Bu<sub>4</sub>NPF<sub>6</sub> (0.1 M). This cyclic voltammogram shows one reduction peak at -1.00 V vs SCE corresponding to the reductive cleavage of the S-Cl bond of the initial compound, and two oxidation peaks at 0.46 and 1.16 V vs SCE corresponding to the oxidation of the phenyl sulfinate and chloride anions, respectively. Figure S3b shows the cyclic voltammetry of diphenyl disulfone (**3c**) as one reduction peak is observed at -1.05 V vs SCE corresponding to the reductive cleavage of the S-S chemical bond, and an oxidation peak at 0.46 V vs SCE corresponding to the oxidation of the phenyl sulfinate anion. Figure S3c shows the cyclic voltammetry of s-phenyl benzenethiosulfonate, PhSO<sub>2</sub>SPh, (**2c**). Two reduction peaks are observed at -1.00 and -1.65 V vs SCE corresponding to the reduction of the initial compound and diphenyl disulfide, respectively. The disulfide is generated through reduction at the first peak of PhSO<sub>2</sub>SPh. Upon reversing the scan, two oxidation peaks are observed at -0.18 and 0.46 V vs SCE corresponding to the oxidation of the phenyl thiolate and the phenyl sulfinate anions, respectively. It is important to note that the reduction of all three compounds produce an anodic peak at 0.46 V vs SCE corresponding to the oxidation of the phenyl sulfinate anion (Figure S3).

### II-4. Cyclic voltammetry of the phenyl sulfinate in the absence and presence of **1c**.

Figure S4a shows the cyclic voltammetry of sodium phenyl sulfinate. It shows a single anodic peak at 0.46 V vs SCE corresponding to the oxidation of this anion. Figure S4b shows the cyclic voltammetry of PhSO<sub>2</sub>Cl (**1c**) before adding the phenyl sulfinate salt. When a mixture of PhSO<sub>2</sub>Cl and PhSO<sub>2</sub>Na are mixed in a 1:1 mole ratio, the homogenous electron transfer reaction takes place to afford the diphenyl disulfone and its peak is observed on the cyclic voltammogram (Figure S4c).

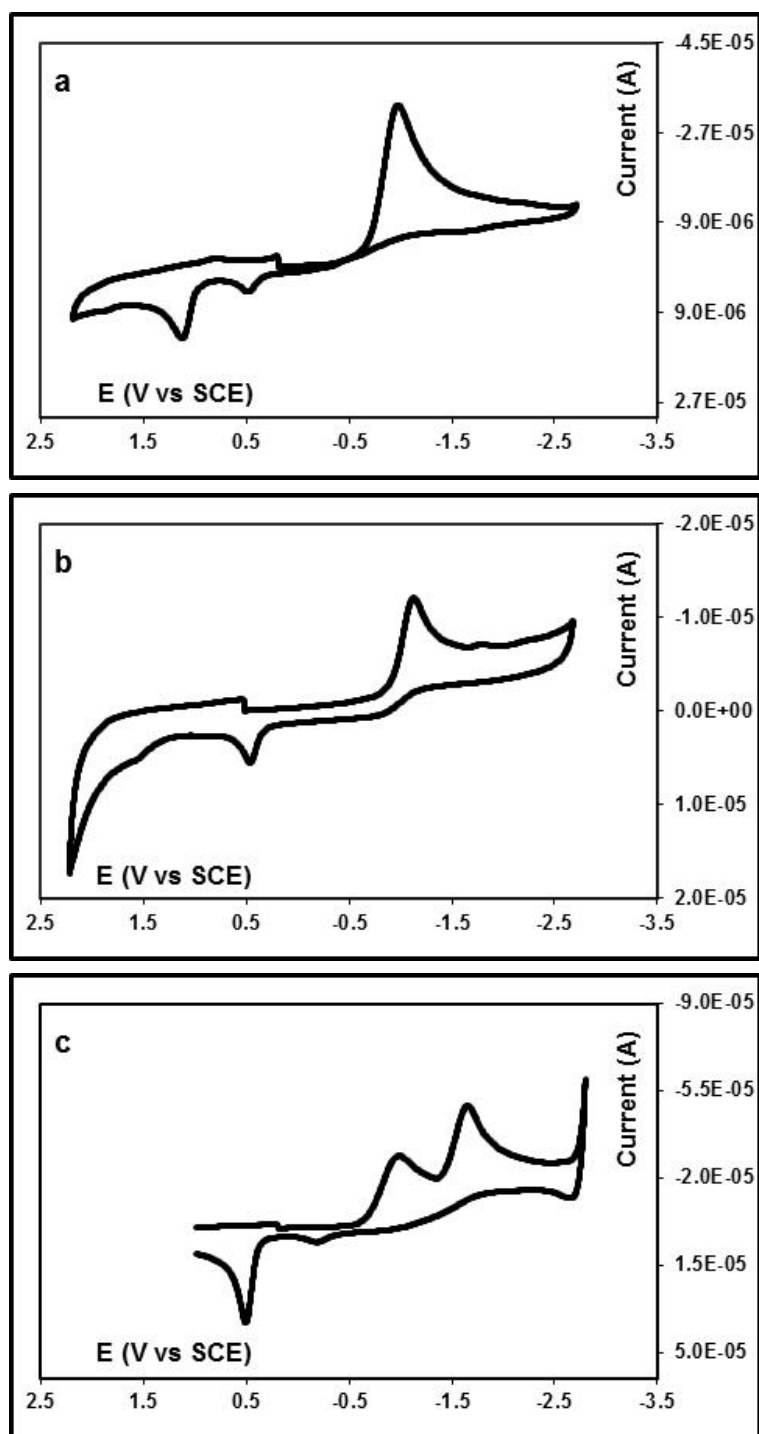

**Figure S3.** Cyclic voltammetry in  $\text{CH}_3\text{CN}/\text{Bu}_4\text{NPF}_6$  (0.1 M) at a glassy carbon electrode and at  $\nu = 200$  mV/s of (a)  $\text{PhSO}_2\text{Cl}$  (1.53 mM); (b)  $\text{PhSO}_2\text{SO}_2\text{Ph}$  (1.48 mM); and (c)  $\text{PhSO}_2\text{SPh}$  (2.36 mM).

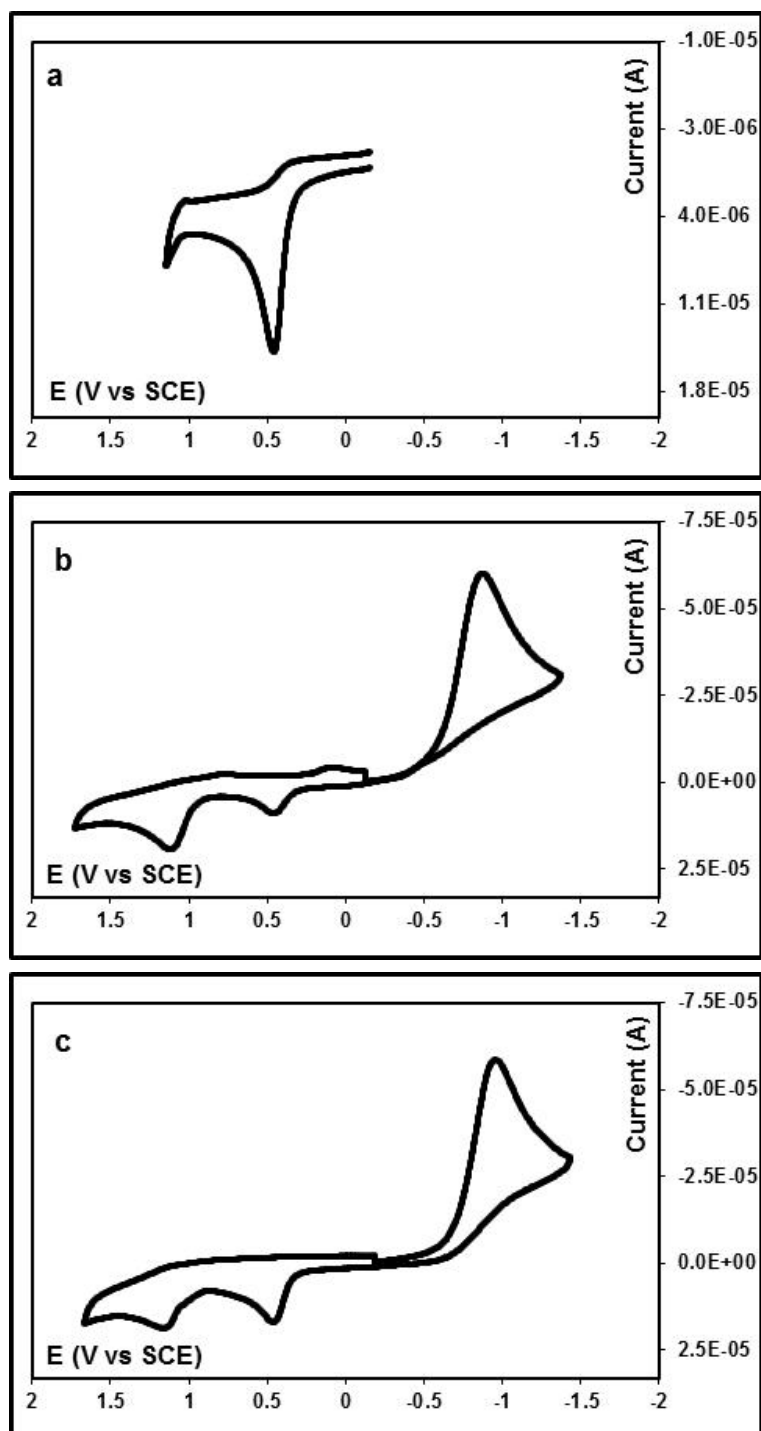

**Figure S4.** Cyclic voltammetry in  $\text{CH}_3\text{CN}/\text{Bu}_4\text{NPF}_6$  (0.1 M) at a glassy carbon electrode and at  $v = 200$  mV/s of (a)  $\text{PhSO}_2\text{Na}$  (1.34 mM); (b)  $\text{PhSO}_2\text{Cl}$  (2.32 mM); and (c) a mixture of  $\text{PhSO}_2\text{Cl}$  (2.32 mM) and  $\text{PhSO}_2\text{Na}$  (2.50 mM).

II-5. Variation of the reduction peak potential with the scan rate for compounds **1a-g**:

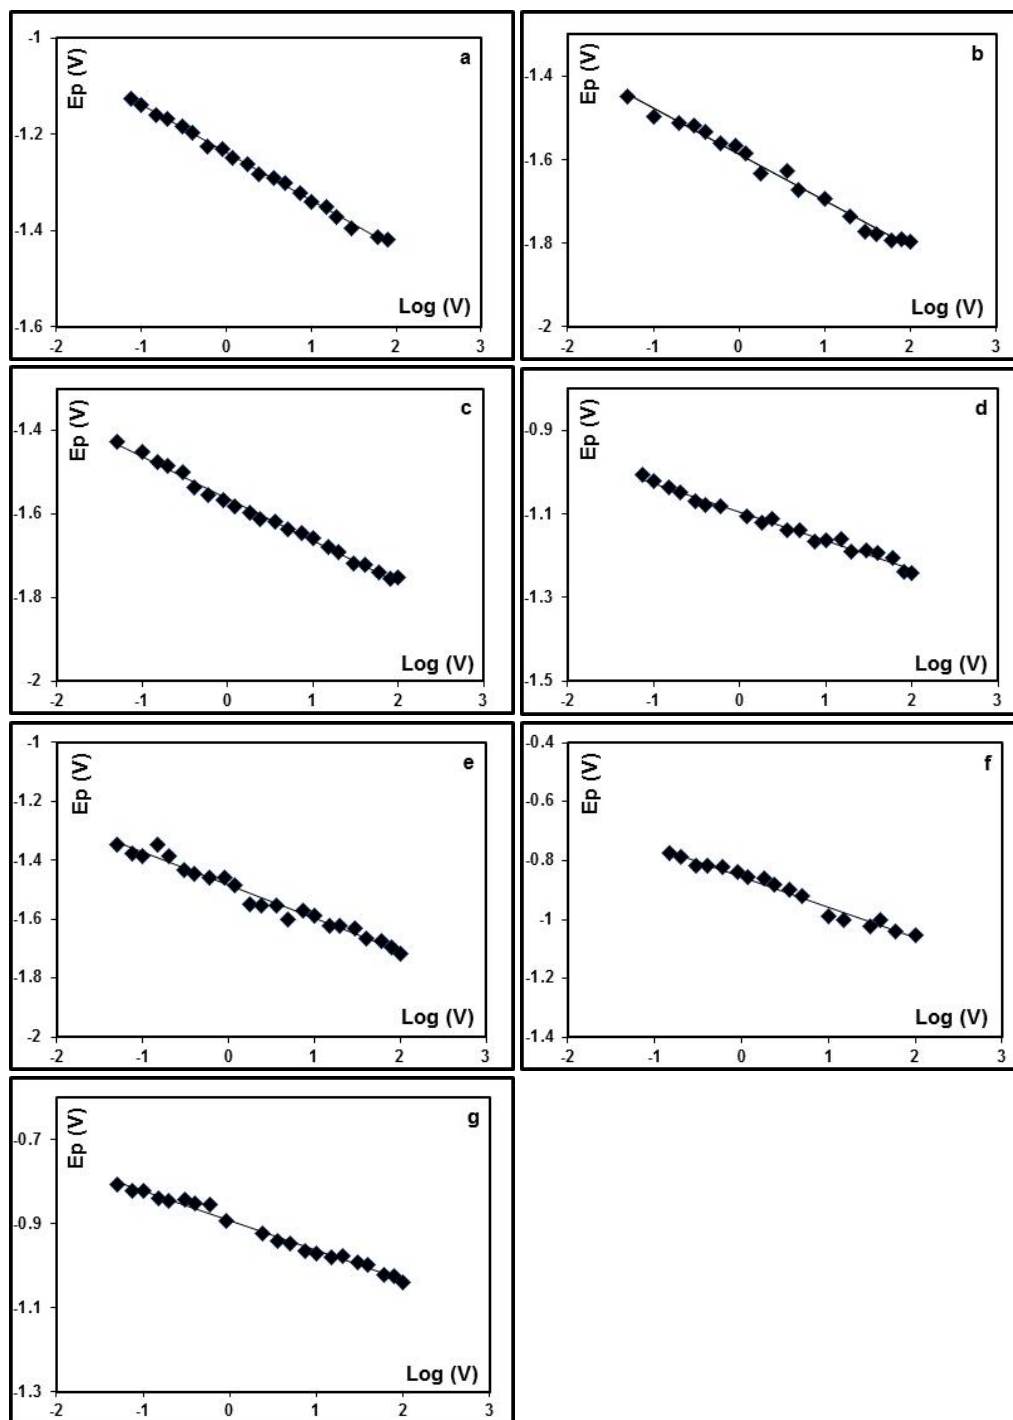

**Figure S5:** Variation of the reduction peak potential with the log of the scan rate ( $\log(v)$ ) for (a) **1a** (2.06 mM); (b) **1b** (1.52 mM); (c): **1c** (1.53 mM); (d): **1d** (1.90 mM); (e): **1e** (1.20 mM); (f) **1f** (2.03 mM); and (g) **1g** (1.70 mM);

## II-6. Cyclic voltammetry as a function of the concentration and the scan rate

### II-6.1. 4-methylphenyl sulfonyl chloride (**1b**):

Similar to what is reported for the phenyl sulfonyl chloride in the manuscript, all the investigated compounds show a similar dependence on the concentration and scan rate. Two additional examples are presented here. The variation of the cyclic voltammograms of the sulfonyl chloride **1b** in CH<sub>3</sub>CN/Bu<sub>4</sub>NPF<sub>6</sub> (0.1 M) with the scan rate at two different concentrations (1.4 mM and 5.7 mM) are shown as a typical example on Figure S6. For the low concentration (1.4 mM), the crossing observed at 0.2 V/s (Figure S6a) decreases very quickly as the scan rate is increased to 0.3 V/s (Figure S6b) and is eliminated at 0.6 V/s (Figure S6c). For the higher concentration (5.7 mM), the crossing that is more pronounced at 0.2 V/s (Figure S6d) still persists when increasing the scan rate to 0.6 V/s (Figure S6e) and disappears only at much higher scan rates (5 V/s or higher) as shown on Figure S6f. These results confirm the occurrence of an autocatalytic process that is more pronounced for high concentrations and low scan rates. Similar observations can be made for the 4-nitrophenyl sulfonyl chloride as shown in Figure S7.

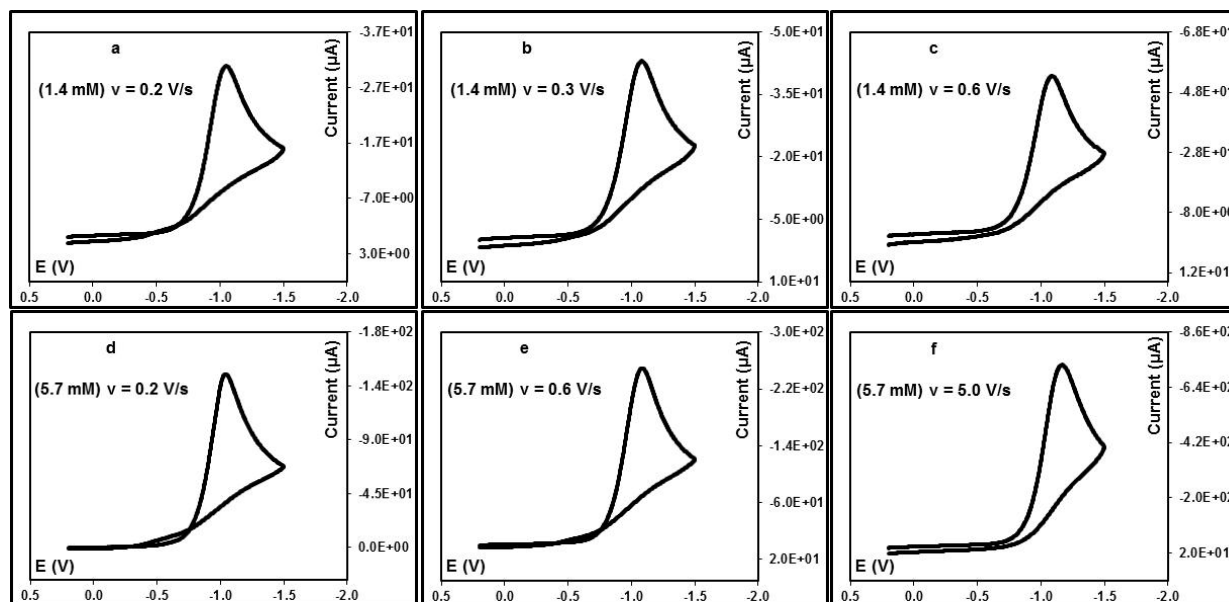

**Figure S6.** Cyclic voltammetry in CH<sub>3</sub>CN/Bu<sub>4</sub>NPF<sub>6</sub> (0.1 M) at a glassy carbon electrode of **1b** at (a) 1.4 mM,  $v = 0.2$  V/s; (b) 1.4 mM,  $v = 0.3$  V/s (c): 1.4 mM,  $v = 0.6$  V/s; (d): 5.7 mM,  $v = 0.2$  V/s; (e): 5.7 mM,  $v = 0.6$  V/s; and (f) 5.7 mM,  $v = 5$  V/s.



## II-6.2. 4-nitrophenyl sulfonyl chloride (**1g**):

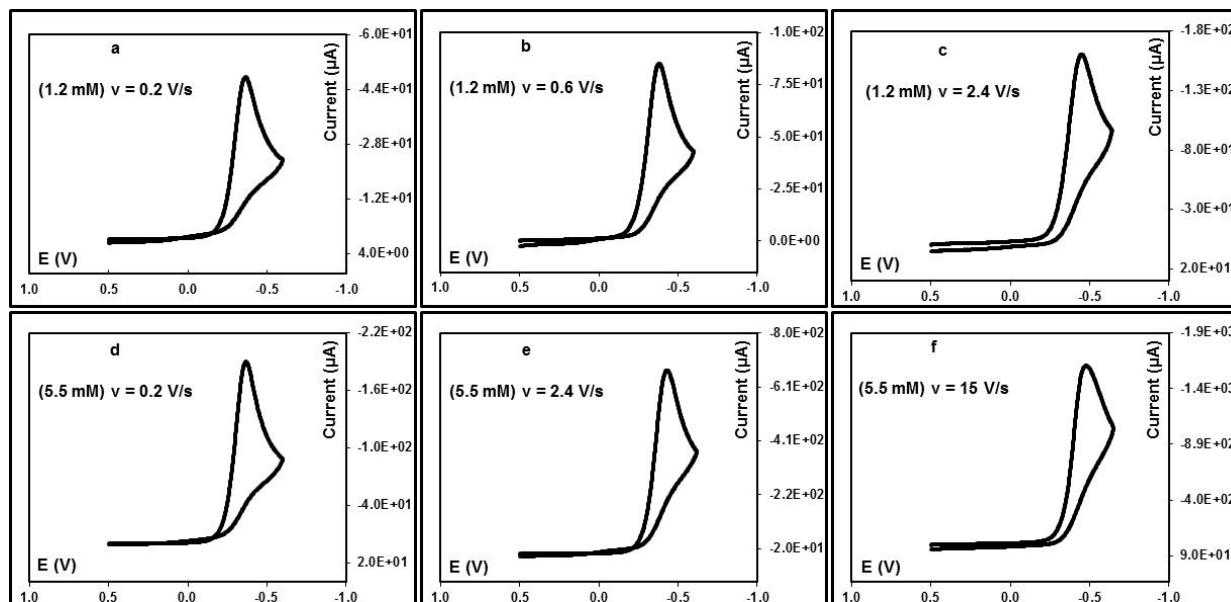

**Figure S7.** Cyclic voltammetry in  $\text{CH}_3\text{CN}/\text{Bu}_4\text{NPF}_6$  (0.1 M) at a glassy carbon electrode of **1g** at (a) 1.2 mM,  $v = 0.2$  V/s; (b) 1.2 mM,  $v = 0.6$  V/s (c): 1.2 mM,  $v = 2.4$  V/s; (d): 5.5 mM,  $v = 0.2$  V/s; (e): 5.5 mM,  $v = 2.4$  V/s; and (f) 5.5 mM,  $v = 15$  V/s.

## II-7 Cyclic voltammetry of phenyl sulfonyl chloride (**1c**) in the presence of a proton donor (pentachlorophenol)

Figure S8 shows cyclic voltammograms of phenyl sulfonyl chloride (**1c**) in the absence (Figure S8a) and in the presence of a proton donor, pentachlorophenol, (Figure S8a). Upon addition of pentachlorophenol to the initial solution of phenyl sulfonyl chloride (**1c**) (1:1), the trace crossing is totally eliminated. This provides further support for the autocatalytic process described in the mechanism (Scheme 1) in the manuscript.

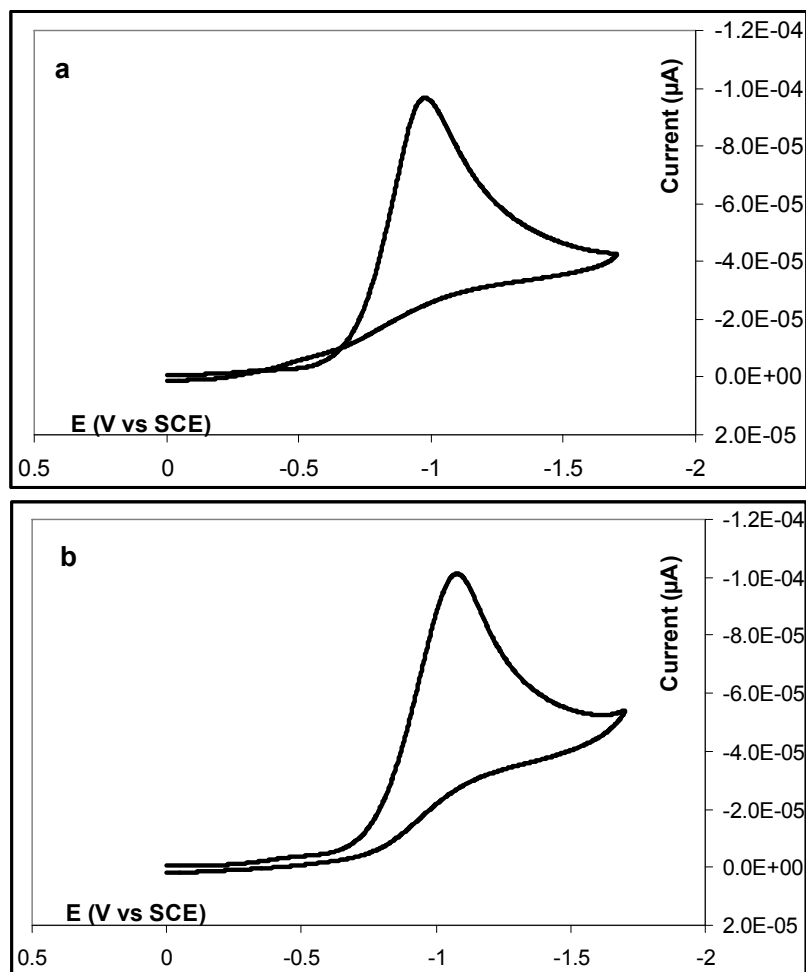

**Figure S8.** Cyclic voltammetry in  $\text{CH}_3\text{CN}/\text{Bu}_4\text{NPF}_6$  (0.1 M) at a glassy carbon electrode at a scan rate  $\nu = 0.2$  V/s of (a) **1c** (2.5 mM) and (b) **1c** (2.5 mM) + pentachlorophenol (2.5 mM).

#### II-8. Electrolysis of phenylthiophenylsulfonate (**2c**)

The electrolysis of phenylthiophenylsulfonate (**2c**) has been performed in acetonitrile, in the presence of tetramethyl ammonium hexafluorophosphate ( $\text{Me}_4\text{NPF}_6$ , 0.10 M). The consumption of the initial compound and the formation of the electrolytic products were monitored by cyclic voltammetry (Figure S9) and HPLC. This compound consumed one electron per molecule with the formation of diphenyl disulfide (**4c**) and phenyl sulfinate anion as final products in quantitative yields.

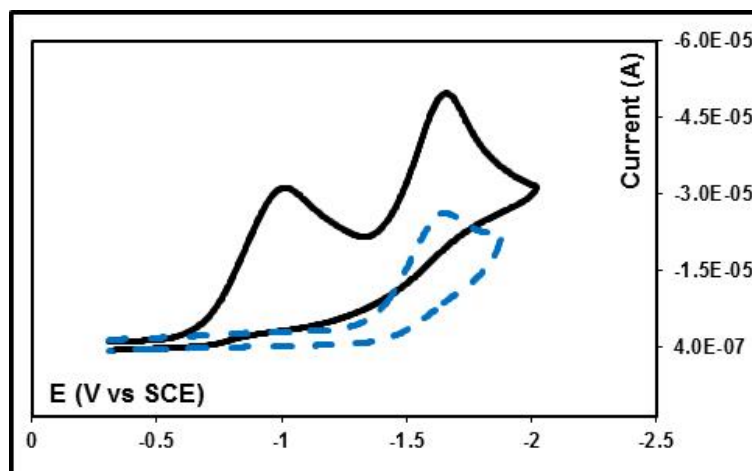

**Figure S9.** Cyclic voltammetry in  $\text{CH}_3\text{CN}/\text{Bu}_4\text{NPF}_6$  (0.1 M) at a glassy carbon electrode of **2c** at a scan rate  $\nu = 0.2$  V/s before (solid line) and after (dashed line) electrolysis.

### III- Computational calculations

All of the calculations were performed using the Gaussian 03 package.<sup>1</sup> The LUMOs and SOMOs were calculated after a full optimization without imposed symmetry of the conformations using the B3LYP method with the 6-31G+(d,p) basis set starting from preliminary optimizations performed with semi-empirical methods. The obtained conformations were verified by running frequency calculations for the B3LYP calculations.

1. Gaussian 03, Revision B.03, M. J. Frisch, G. W. Trucks, H. B. Schlegel, G. E. Scuseria, M. A. Robb, J. R. Cheeseman, Jr. J. A. Montgomery, T. Vreven, K. N. Kudin, J. C. Burant, J. M. Millam, S. S. Iyengar, J. Tomasi, V. Barone, B. Mennucci, M. Cossi, G. Scalmani, N. Rega, G. A. Petersson, H. Nakatsuji, M. Hada, M. Ehara, K. Toyota, R. Fukuda, J. Hasegawa, M. Ishida, T. Nakajima, Y. Honda, O. Kitao, H. Nakai, M. Klene, X. Li,; J. E. Knox, H. P. Hratchian, J. B. Cross, C. Adamo, J. Jaramillo, R. Gomperts, R. E. Stratmann, O. Yazyev, A. J. Austin, R. Cammi, C. Pomelli, J. W. Ochterski, P. Y. Ayala,; K. Morokuma, G. A. Voth, P. Salvador,; J. J. Dannenberg, V. G. Zakrzewski, S. Dapprich, A. D. Daniels, M. C. Strain, O. D. Farkas, K. Malick,; A. D. Rabuck, K. Raghavachari, J. B. Foresman, J. V. Ortiz, Q. Cui,; A. G. Baboul, S. Clifford, J. Cioslowski, B. B. Stefanov, G. Liu, A. Liashenko, P. Piskorz, I. Komaromi, R. L. Martin, D. J. Fox, T. Keith, M. A. Al-Laham, C. Y. Peng, A. Nanayakkara, M. Challacombe, P. M. W. Gill, B. Johnson, W. Chen, M. W. Wong, C. Gonzalez and J. A. Pople, Gaussian, Inc., Pittsburgh PA, 2003.

## Total Energies and Coordinates

### p-Methoxyphenyl sulfonyl chloride (1a).

Total Energy: -1354.97340788 a.u.

| Center<br>Number | Atomic<br>Number | Atomic<br>Type | Coordinates (Angstroms) |           |           |
|------------------|------------------|----------------|-------------------------|-----------|-----------|
|                  |                  |                | X                       | Y         | Z         |
| 1                | 6                | 0              | 0.268220                | 0.365447  | -0.006717 |
| 2                | 6                | 0              | 0.192908                | 0.139100  | 1.367139  |
| 3                | 6                | 0              | 1.358677                | 0.173293  | 2.131461  |
| 4                | 6                | 0              | 2.610198                | 0.417080  | 1.549280  |
| 5                | 6                | 0              | 2.683313                | 0.641342  | 0.183733  |
| 6                | 6                | 0              | 1.515691                | 0.614613  | -0.602628 |
| 7                | 1                | 0              | -0.640863               | 0.347359  | -0.594608 |
| 8                | 1                | 0              | -0.764477               | -0.050617 | 1.839820  |
| 9                | 1                | 0              | 3.503596                | 0.440418  | 2.163268  |
| 10               | 1                | 0              | 3.632550                | 0.841786  | -0.300991 |
| 11               | 16               | 0              | 1.256225                | -0.122687 | 3.879624  |
| 12               | 8                | 0              | 2.426766                | 0.443543  | 4.542467  |
| 13               | 8                | 0              | -0.103292               | 0.137567  | 4.343046  |
| 14               | 17               | 0              | 1.503814                | -2.246717 | 3.991129  |
| 15               | 8                | 0              | 1.698471                | 0.842623  | -1.925408 |
| 16               | 6                | 0              | 0.568658                | 0.818991  | -2.798273 |
| 17               | 1                | 0              | 0.964321                | 1.016750  | -3.794269 |
| 18               | 1                | 0              | 0.081008                | -0.162499 | -2.785906 |
| 19               | 1                | 0              | -0.154254               | 1.598043  | -2.530261 |

### p-Methoxyphenyl sulfonyl chloride reduced form (1a+e).

Total Energy: -1354.76338159 a.u.

| Center<br>Number | Atomic<br>Number | Atomic<br>Type | Coordinates (Angstroms) |           |           |
|------------------|------------------|----------------|-------------------------|-----------|-----------|
|                  |                  |                | X                       | Y         | Z         |
| 1                | 6                | 0              | -0.231269               | 0.747609  | 0.318739  |
| 2                | 6                | 0              | -0.086707               | 0.407274  | 1.663765  |
| 3                | 6                | 0              | 1.146259                | -0.058388 | 2.116845  |
| 4                | 6                | 0              | 2.231752                | -0.199990 | 1.264371  |
| 5                | 6                | 0              | 2.093999                | 0.141564  | -0.088055 |
| 6                | 6                | 0              | 0.860822                | 0.618487  | -0.552278 |
| 7                | 1                | 0              | -1.172168               | 1.112810  | -0.076956 |
| 8                | 1                | 0              | -0.911655               | 0.479966  | 2.362797  |
| 9                | 1                | 0              | 3.165452                | -0.587833 | 1.654751  |
| 10               | 1                | 0              | 2.942166                | 0.032391  | -0.753123 |
| 11               | 16               | 0              | 1.353060                | -0.489240 | 3.933058  |
| 12               | 8                | 0              | -0.206534               | -0.922274 | 4.359389  |

|    |    |   |          |           |           |
|----|----|---|----------|-----------|-----------|
| 13 | 8  | 0 | 2.482919 | -1.721946 | 3.865377  |
| 14 | 8  | 0 | 0.615560 | 0.988773  | -1.881931 |
| 15 | 6  | 0 | 1.708733 | 0.916740  | -2.825590 |
| 16 | 1  | 0 | 2.077630 | -0.110790 | -2.938497 |
| 17 | 1  | 0 | 1.295608 | 1.262688  | -3.773798 |
| 18 | 1  | 0 | 2.540956 | 1.566552  | -2.526860 |
| 19 | 17 | 0 | 2.343176 | 2.200739  | 4.530155  |

---

**p-Methylphenyl sulfonyl chloride (1b).**

Total Energy: -1279.76397460 a.u.

---

| Center<br>Number | Atomic<br>Number | Atomic<br>Type | Coordinates (Angstroms) |           |           |
|------------------|------------------|----------------|-------------------------|-----------|-----------|
|                  |                  |                | X                       | Y         | Z         |
| 1                | 6                | 0              | 0.098585                | -0.395769 | 0.026490  |
| 2                | 6                | 0              | 0.116861                | -0.364759 | 1.419010  |
| 3                | 6                | 0              | 1.268292                | 0.097904  | 2.059685  |
| 4                | 6                | 0              | 2.391702                | 0.517976  | 1.346651  |
| 5                | 6                | 0              | 2.348385                | 0.477380  | -0.046446 |
| 6                | 6                | 0              | 1.209768                | 0.018571  | -0.726922 |
| 7                | 1                | 0              | -0.795447               | -0.743682 | -0.483635 |
| 8                | 1                | 0              | -0.744692               | -0.677829 | 1.998270  |
| 9                | 1                | 0              | 3.269853                | 0.879948  | 1.869738  |
| 10               | 1                | 0              | 3.213018                | 0.811822  | -0.612702 |
| 11               | 6                | 0              | 1.183191                | -0.050052 | -2.234324 |
| 12               | 1                | 0              | 1.935778                | 0.606770  | -2.678739 |
| 13               | 1                | 0              | 1.389630                | -1.071063 | -2.578464 |
| 14               | 1                | 0              | 0.203218                | 0.234702  | -2.629304 |
| 15               | 16               | 0              | 1.304092                | 0.154017  | 3.843340  |
| 16               | 8                | 0              | 2.328302                | 1.096297  | 4.282287  |
| 17               | 8                | 0              | -0.060615               | 0.191006  | 4.358915  |
| 18               | 17               | 0              | 2.055209                | -1.788516 | 4.325355  |

---

**p-Methylbenzene sulfonyl chloride reduced form (1b+e)**

Total Energy: -1279.84882231 a.u.

---

| Center<br>Number | Atomic<br>Number | Atomic<br>Type | Coordinates (Angstroms) |           |           |
|------------------|------------------|----------------|-------------------------|-----------|-----------|
|                  |                  |                | X                       | Y         | Z         |
| 1                | 6                | 0              | 0.116214                | -0.450330 | 0.023759  |
| 2                | 6                | 0              | 0.105737                | -0.383256 | 1.420714  |
| 3                | 6                | 0              | 1.202249                | 0.157251  | 2.086566  |
| 4                | 6                | 0              | 2.313132                | 0.612106  | 1.374952  |
| 5                | 6                | 0              | 2.311421                | 0.538864  | -0.017974 |
| 6                | 6                | 0              | 1.214999                | 0.006552  | -0.715806 |

|    |    |   |           |           |           |
|----|----|---|-----------|-----------|-----------|
| 7  | 1  | 0 | -0.742273 | -0.869495 | -0.497597 |
| 8  | 1  | 0 | -0.744257 | -0.736070 | 1.995452  |
| 9  | 1  | 0 | 3.160332  | 1.021536  | 1.914997  |
| 10 | 1  | 0 | 3.177590  | 0.895242  | -0.572892 |
| 11 | 16 | 0 | 1.228609  | 0.191915  | 3.920156  |
| 12 | 8  | 0 | 2.045303  | 1.411015  | 4.257818  |
| 13 | 8  | 0 | -0.225988 | 0.194761  | 4.311700  |
| 14 | 17 | 0 | 2.642518  | -2.295591 | 4.143904  |
| 15 | 6  | 0 | 1.224311  | -0.062684 | -2.227050 |
| 16 | 1  | 0 | 1.207581  | 0.939433  | -2.675090 |
| 17 | 1  | 0 | 2.123678  | -0.567775 | -2.599516 |
| 18 | 1  | 0 | 0.353977  | -0.608765 | -2.604892 |

---

### Phenyl sulfonyl chloride (1c).

Total Energy: -1240.44160636 a.u.

| Center Number | Atomic Number | Atomic Type | Coordinates (Angstroms) |           |           |
|---------------|---------------|-------------|-------------------------|-----------|-----------|
|               |               |             | X                       | Y         | Z         |
| 1             | 6             | 0           | 0.080744                | 0.452166  | 0.033414  |
| 2             | 6             | 0           | 0.107370                | 0.392696  | 1.427632  |
| 3             | 6             | 0           | 1.260366                | -0.093277 | 2.046937  |
| 4             | 6             | 0           | 2.381623                | -0.510552 | 1.327250  |
| 5             | 6             | 0           | 2.335818                | -0.442910 | -0.065920 |
| 6             | 6             | 0           | 1.190965                | 0.038176  | -0.709201 |
| 7             | 1             | 0           | -0.807479               | 0.820166  | -0.470272 |
| 8             | 1             | 0           | -0.744276               | 0.703274  | 2.022449  |
| 9             | 1             | 0           | 3.256947                | -0.885824 | 1.845524  |
| 10            | 1             | 0           | 3.193331                | -0.767543 | -0.646732 |
| 11            | 16            | 0           | 1.304796                | -0.179464 | 3.834553  |
| 12            | 8             | 0           | -0.057915               | -0.176863 | 4.355666  |
| 13            | 8             | 0           | 2.296174                | -1.165827 | 4.250217  |
| 14            | 17            | 0           | 2.128410                | 1.724646  | 4.333289  |
| 15            | 1             | 0           | 1.163305                | 0.088902  | -1.793457 |

---

### Phenyl sulfonyl chloride reduced form (1c+e).

Total Energy: -1240.52857159 a.u.

| Center Number | Atomic Number | Atomic Type | Coordinates (Angstroms) |           |           |
|---------------|---------------|-------------|-------------------------|-----------|-----------|
|               |               |             | X                       | Y         | Z         |
| 1             | 6             | 0           | 0.160581                | 0.577183  | 0.020606  |
| 2             | 6             | 0           | 0.149122                | 0.499647  | 1.416393  |
| 3             | 6             | 0           | 1.202781                | -0.136072 | 2.072230  |
| 4             | 6             | 0           | 2.274812                | -0.676100 | 1.361954  |
| 5             | 6             | 0           | 2.280092                | -0.594408 | -0.033047 |

|    |    |   |           |           |           |
|----|----|---|-----------|-----------|-----------|
| 6  | 6  | 0 | 1.224700  | 0.031778  | -0.705140 |
| 7  | 1  | 0 | -0.659921 | 1.065565  | -0.499581 |
| 8  | 1  | 0 | -0.666627 | 0.912558  | 2.000563  |
| 9  | 1  | 0 | 3.081591  | -1.158542 | 1.903529  |
| 10 | 1  | 0 | 3.109346  | -1.016964 | -0.595211 |
| 11 | 16 | 0 | 1.217500  | -0.200861 | 3.908282  |
| 12 | 8  | 0 | -0.236743 | -0.117676 | 4.291922  |
| 13 | 8  | 0 | 1.952107  | -1.476043 | 4.227351  |
| 14 | 17 | 0 | 2.767395  | 2.190694  | 4.211956  |
| 15 | 1  | 0 | 1.233445  | 0.097006  | -1.790460 |

-----

**p-Chlorophenyl sulfonyl chloride (1d).**

Total Energy: -1700.03383484 a.u.

| Center<br>Number | Atomic<br>Number | Atomic<br>Type | Coordinates (Angstroms) |           |           |
|------------------|------------------|----------------|-------------------------|-----------|-----------|
|                  |                  |                | X                       | Y         | Z         |
| 1                | 6                | 0              | 0.079840                | 0.456765  | 0.033032  |
| 2                | 6                | 0              | 0.113427                | 0.391620  | 1.424775  |
| 3                | 6                | 0              | 1.263097                | -0.096299 | 2.048701  |
| 4                | 6                | 0              | 2.381361                | -0.513260 | 1.324363  |
| 5                | 6                | 0              | 2.344099                | -0.446819 | -0.067281 |
| 6                | 6                | 0              | 1.195247                | 0.038660  | -0.698564 |
| 7                | 1                | 0              | -0.801680               | 0.824850  | -0.479467 |
| 8                | 1                | 0              | -0.741398               | 0.703499  | 2.014467  |
| 9                | 1                | 0              | 3.258288                | -0.892318 | 1.837222  |
| 10               | 1                | 0              | 3.194730                | -0.770016 | -0.656511 |
| 11               | 17               | 0              | 1.151150                | 0.122060  | -2.444906 |
| 12               | 16               | 0              | 1.306279                | -0.185825 | 3.833602  |
| 13               | 8                | 0              | -0.058198               | -0.214302 | 4.348207  |
| 14               | 8                | 0              | 2.318239                | -1.152869 | 4.243723  |
| 15               | 17               | 0              | 2.085815                | 1.731985  | 4.339985  |

-----

**p-Chlorophenyl sulfonyl chloride reduced form (1d+e).**

Total Energy: -1700.12688874 a.u.

| Center<br>Number | Atomic<br>Number | Atomic<br>Type | Coordinates (Angstroms) |           |           |
|------------------|------------------|----------------|-------------------------|-----------|-----------|
|                  |                  |                | X                       | Y         | Z         |
| 1                | 6                | 0              | -0.010952               | -0.029888 | 0.043725  |
| 2                | 6                | 0              | -0.004508               | 0.085452  | 1.436136  |
| 3                | 6                | 0              | 1.208294                | 0.154145  | 2.119695  |
| 4                | 6                | 0              | 2.420499                | 0.091715  | 1.434486  |
| 5                | 6                | 0              | 2.425641                | -0.023603 | 0.042064  |
| 6                | 6                | 0              | 1.207032                | -0.083409 | -0.633603 |
| 7                | 1                | 0              | -0.945056               | -0.079328 | -0.506012 |

|    |    |   |           |           |           |
|----|----|---|-----------|-----------|-----------|
| 8  | 1  | 0 | -0.933862 | 0.133358  | 1.993789  |
| 9  | 1  | 0 | 3.350350  | 0.144432  | 1.990877  |
| 10 | 1  | 0 | 3.359237  | -0.068228 | -0.508945 |
| 11 | 17 | 0 | 1.206203  | -0.228767 | -2.399280 |
| 12 | 16 | 0 | 1.209273  | 0.252123  | 3.953673  |
| 13 | 17 | 0 | 1.216478  | -2.577412 | 4.263269  |
| 14 | 8  | 0 | 2.496802  | 0.961901  | 4.278959  |
| 15 | 8  | 0 | -0.081634 | 0.954889  | 4.280744  |

**p-Fluorophenyl sulfonyl chloride (1e).**

Total Energy: -1339.68070010 a.u.

| Center Number | Atomic Number | Atomic Type | Coordinates (Angstroms) |           |           |
|---------------|---------------|-------------|-------------------------|-----------|-----------|
|               |               |             | X                       | Y         | Z         |
| 1             | 6             | 0           | -0.015831               | -0.009868 | 0.028086  |
| 2             | 6             | 0           | -0.016014               | 0.041863  | 1.420765  |
| 3             | 6             | 0           | 1.207965                | 0.074235  | 2.094160  |
| 4             | 6             | 0           | 2.432075                | 0.046377  | 1.420772  |
| 5             | 6             | 0           | 2.432055                | -0.005414 | 0.028132  |
| 6             | 6             | 0           | 1.208146                | -0.034560 | -0.634602 |
| 7             | 1             | 0           | -0.939057               | -0.028497 | -0.539859 |
| 8             | 1             | 0           | -0.947186               | 0.068935  | 1.975346  |
| 9             | 1             | 0           | 3.363242                | 0.076969  | 1.975196  |
| 10            | 1             | 0           | 3.355304                | -0.020757 | -0.539874 |
| 11            | 9             | 0           | 1.208296                | -0.085952 | -1.984743 |
| 12            | 16            | 0           | 1.207637                | 0.144212  | 3.878974  |
| 13            | 8             | 0           | 2.483836                | 0.677658  | 4.342115  |
| 14            | 8             | 0           | -0.073024               | 0.667135  | 4.341818  |
| 15            | 17            | 0           | 1.216284                | -1.924890 | 4.393290  |

**p-Fluorophenyl sulfonyl chloride (1e+e).**

Total Energy: -1339.77232599 a.u.

| Center Number | Atomic Number | Atomic Type | Coordinates (Angstroms) |           |           |
|---------------|---------------|-------------|-------------------------|-----------|-----------|
|               |               |             | X                       | Y         | Z         |
| 1             | 6             | 0           | -0.012401               | -0.035946 | 0.043027  |
| 2             | 6             | 0           | -0.006274               | 0.084004  | 1.435648  |
| 3             | 6             | 0           | 1.207570                | 0.156325  | 2.118680  |
| 4             | 6             | 0           | 2.421701                | 0.092223  | 1.435344  |
| 5             | 6             | 0           | 2.428296                | -0.027686 | 0.042724  |
| 6             | 6             | 0           | 1.208068                | -0.090451 | -0.618314 |
| 7             | 1             | 0           | -0.937496               | -0.090207 | -0.521680 |
| 8             | 1             | 0           | -0.934548               | 0.132428  | 1.994740  |
| 9             | 1             | 0           | 3.349763                | 0.146935  | 1.994207  |



|    |    |   |           |           |           |
|----|----|---|-----------|-----------|-----------|
| 10 | 1  | 0 | 3.353600  | -0.075672 | -0.522208 |
| 11 | 9  | 0 | 1.208301  | -0.208571 | -1.983855 |
| 12 | 16 | 0 | 1.207455  | 0.256852  | 3.951133  |
| 13 | 8  | 0 | 2.493461  | 0.969189  | 4.277918  |
| 14 | 8  | 0 | -0.084703 | 0.957783  | 4.278314  |
| 15 | 17 | 0 | 1.220936  | -2.579757 | 4.273899  |

**p-Cyanophenyl sulfonyl chloride (1f).**

Total Energy: -1332.68031235 a.u.

| Center<br>Number | Atomic<br>Number | Atomic<br>Type | Coordinates (Angstroms) |           |           |
|------------------|------------------|----------------|-------------------------|-----------|-----------|
|                  |                  |                | X                       | Y         | Z         |
| 1                | 6                | 0              | 0.076051                | -0.522420 | -0.009478 |
| 2                | 6                | 0              | 0.020270                | -0.090655 | 1.316626  |
| 3                | 6                | 0              | 1.139340                | 0.391036  | 1.997622  |
| 4                | 6                | 0              | 2.358470                | 0.438321  | 1.326618  |
| 5                | 6                | 0              | 2.438840                | 0.008849  | -0.009893 |
| 6                | 6                | 0              | 1.297777                | -0.472954 | -0.675550 |
| 7                | 1                | 0              | -0.813440               | -0.897504 | -0.502950 |
| 8                | 1                | 0              | 1.058625                | 0.710621  | 3.030461  |
| 9                | 1                | 0              | 3.246524                | 0.802872  | 1.830944  |
| 10               | 1                | 0              | 1.373545                | -0.806321 | -1.704625 |
| 11               | 16               | 0              | -1.551039               | -0.162743 | 2.182039  |
| 12               | 8                | 0              | -2.414885               | -1.133576 | 1.521391  |
| 13               | 8                | 0              | -1.303372               | -0.180284 | 3.618581  |
| 14               | 6                | 0              | 3.697220                | 0.059899  | -0.699938 |
| 15               | 7                | 0              | 4.716471                | 0.100788  | -1.258761 |
| 16               | 17               | 0              | -2.354396               | 1.753127  | 1.736903  |

**p-Cyanophenyl sulfonyl chloride (1f+e).**

Total Energy: -1332.78224517 a.u.

| Center<br>Number | Atomic<br>Number | Atomic<br>Type | Coordinates (Angstroms) |           |           |
|------------------|------------------|----------------|-------------------------|-----------|-----------|
|                  |                  |                | X                       | Y         | Z         |
| 1                | 6                | 0              | 0.146955                | 0.549435  | 0.017240  |
| 2                | 6                | 0              | 0.139020                | 0.470807  | 1.407987  |
| 3                | 6                | 0              | 1.201204                | -0.147538 | 2.068075  |
| 4                | 6                | 0              | 2.282658                | -0.676151 | 1.361760  |
| 5                | 6                | 0              | 2.297483                | -0.600470 | -0.028333 |
| 6                | 6                | 0              | 1.228249                | 0.014130  | -0.707388 |
| 7                | 1                | 0              | -0.674578               | 1.020324  | -0.513500 |
| 8                | 1                | 0              | -0.684963               | 0.871590  | 1.988523  |
| 9                | 1                | 0              | 3.093866                | -1.147978 | 1.905376  |
| 10               | 1                | 0              | 3.127722                | -1.011058 | -0.594337 |

|    |    |   |           |           |           |
|----|----|---|-----------|-----------|-----------|
| 11 | 6  | 0 | 1.237952  | 0.089090  | -2.139609 |
| 12 | 7  | 0 | 1.246225  | 0.151582  | -3.303423 |
| 13 | 16 | 0 | 1.216096  | -0.196363 | 3.906918  |
| 14 | 8  | 0 | -0.240216 | -0.124086 | 4.281235  |
| 15 | 8  | 0 | 1.964146  | -1.461581 | 4.228432  |
| 16 | 17 | 0 | 2.716862  | 2.194960  | 4.045011  |

---

**p-Nitrophenyl sulfonyl chloride (1g).**

Total Energy: -1444.94370886 a.u.

---

| Center<br>Number | Atomic<br>Number | Atomic<br>Type | Coordinates (Angstroms) |           |           |
|------------------|------------------|----------------|-------------------------|-----------|-----------|
|                  |                  |                | X                       | Y         | Z         |
| 1                | 6                | 0              | 0.128447                | 0.529034  | 0.023024  |
| 2                | 6                | 0              | 0.154490                | 0.485047  | 1.415837  |
| 3                | 6                | 0              | 1.260214                | -0.088959 | 2.045631  |
| 4                | 6                | 0              | 2.341004                | -0.618390 | 1.338372  |
| 5                | 6                | 0              | 2.312965                | -0.573801 | -0.054450 |
| 6                | 6                | 0              | 1.208847                | 0.000881  | -0.682393 |
| 7                | 1                | 0              | -0.707795               | 0.959856  | -0.513243 |
| 8                | 1                | 0              | -0.669535               | 0.877930  | 2.000445  |
| 9                | 1                | 0              | 3.177895                | -1.063583 | 1.864229  |
| 10               | 1                | 0              | 3.124175                | -0.974824 | -0.649097 |
| 11               | 16               | 0              | 1.290713                | -0.154934 | 3.842202  |
| 12               | 8                | 0              | -0.074869               | -0.065186 | 4.343731  |
| 13               | 8                | 0              | 2.216497                | -1.199072 | 4.263042  |
| 14               | 17               | 0              | 2.222371                | 1.696055  | 4.300213  |
| 15               | 7                | 0              | 1.180831                | 0.049266  | -2.162859 |
| 16               | 8                | 0              | 2.143417                | -0.424046 | -2.763852 |
| 17               | 8                | 0              | 0.197211                | 0.560395  | -2.694861 |

---

**p-Nitrophenyl sulfonyl chloride (1g+e).**

Energy = -1445.04837875 a.u.

---

| Center<br>Number | Atomic<br>Number | Atomic<br>Type | Coordinates (Angstroms) |           |           |
|------------------|------------------|----------------|-------------------------|-----------|-----------|
|                  |                  |                | X                       | Y         | Z         |
| 1                | 6                | 0              | -0.002490               | 0.020679  | -0.001537 |
| 2                | 6                | 0              | -0.004469               | 0.018988  | 1.391009  |
| 3                | 6                | 0              | 1.208596                | -0.002992 | 2.082798  |
| 4                | 6                | 0              | 2.429129                | -0.045186 | 1.404908  |
| 5                | 6                | 0              | 2.443415                | -0.044323 | 0.012963  |
| 6                | 6                | 0              | 1.224417                | -0.011101 | -0.671638 |
| 7                | 1                | 0              | -0.923947               | 0.048018  | -0.569840 |
| 8                | 1                | 0              | -0.933761               | 0.048270  | 1.949236  |
| 9                | 1                | 0              | 3.352376                | -0.065147 | 1.973397  |

|    |    |   |           |           |           |
|----|----|---|-----------|-----------|-----------|
| 10 | 1  | 0 | 3.371568  | -0.067346 | -0.544484 |
| 11 | 16 | 0 | 1.196793  | -0.064688 | 3.919643  |
| 12 | 8  | 0 | 2.476054  | 0.621405  | 4.314457  |
| 13 | 8  | 0 | -0.102450 | 0.592011  | 4.297148  |
| 14 | 17 | 0 | 1.216700  | -2.879263 | 3.913586  |
| 15 | 7  | 0 | 1.233459  | -0.001381 | -2.135665 |
| 16 | 8  | 0 | 2.325856  | -0.028488 | -2.714725 |
| 17 | 8  | 0 | 0.148382  | 0.035230  | -2.728029 |

---

### P-Methoxyphenyl sulfonyl radical.

Total Energy: - 894.75438521 a.u.

| Center<br>Number | Atomic<br>Number | Atomic<br>Type | Coordinates (Angstroms) |           |           |
|------------------|------------------|----------------|-------------------------|-----------|-----------|
|                  |                  |                | X                       | Y         | Z         |
| 1                | 6                | 0              | -0.198939               | -0.271539 | 0.076918  |
| 2                | 6                | 0              | -0.082806               | -0.507719 | 1.438616  |
| 3                | 6                | 0              | 1.077602                | -0.092386 | 2.106311  |
| 4                | 6                | 0              | 2.130606                | 0.513080  | 1.421291  |
| 5                | 6                | 0              | 2.012740                | 0.751693  | 0.051131  |
| 6                | 6                | 0              | 0.846599                | 0.357515  | -0.624875 |
| 7                | 1                | 0              | -1.091040               | -0.560864 | -0.468169 |
| 8                | 1                | 0              | -0.887764               | -0.982970 | 1.988592  |
| 9                | 1                | 0              | 3.023023                | 0.819539  | 1.956276  |
| 10               | 1                | 0              | 2.824914                | 1.242358  | -0.470869 |
| 11               | 16               | 0              | 1.265938                | -0.462072 | 3.862587  |
| 12               | 8                | 0              | 2.283586                | 0.477840  | 4.417119  |
| 13               | 8                | 0              | -0.100607               | -0.577179 | 4.450455  |
| 14               | 8                | 0              | 0.632576                | 0.539427  | -1.952415 |
| 15               | 6                | 0              | 1.644868                | 1.166841  | -2.738183 |
| 16               | 1                | 0              | 2.572866                | 0.583274  | -2.726942 |
| 17               | 1                | 0              | 1.249042                | 1.201672  | -3.753102 |
| 18               | 1                | 0              | 1.843050                | 2.186426  | -2.387542 |

---

### P-Methylphenyl sulfonyl radical.

Total Energy: -819.54523656 a.u.

| Center<br>Number | Atomic<br>Number | Atomic<br>Type | Coordinates (Angstroms) |           |           |
|------------------|------------------|----------------|-------------------------|-----------|-----------|
|                  |                  |                | X                       | Y         | Z         |
| 1                | 6                | 0              | -0.000571               | -0.292767 | -0.037386 |
| 2                | 6                | 0              | -0.048895               | -0.353555 | 1.353926  |
| 3                | 6                | 0              | 1.119372                | -0.095817 | 2.075527  |
| 4                | 6                | 0              | 2.328792                | 0.183381  | 1.438518  |
| 5                | 6                | 0              | 2.351931                | 0.239048  | 0.044135  |
| 6                | 6                | 0              | 1.195833                | -0.000088 | -0.714112 |

|    |    |   |           |           |           |
|----|----|---|-----------|-----------|-----------|
| 7  | 1  | 0 | -0.908719 | -0.471634 | -0.607113 |
| 8  | 1  | 0 | -0.976255 | -0.569172 | 1.873389  |
| 9  | 1  | 0 | 3.222456  | 0.378395  | 2.021311  |
| 10 | 1  | 0 | 3.284381  | 0.476274  | -0.460699 |
| 11 | 16 | 0 | 1.086108  | -0.232052 | 3.882938  |
| 12 | 8  | 0 | 2.225202  | 0.569566  | 4.416558  |
| 13 | 8  | 0 | -0.318139 | 0.004705  | 4.326812  |
| 14 | 6  | 0 | 1.232840  | 0.036956  | -2.222823 |
| 15 | 1  | 0 | 2.155160  | 0.494847  | -2.589970 |
| 16 | 1  | 0 | 1.175142  | -0.976044 | -2.639441 |
| 17 | 1  | 0 | 0.386993  | 0.602473  | -2.627327 |

---

### Phenyl sulfonyl radical.

Total Energy: -780.22316376 a.u.

| Center<br>Number | Atomic<br>Number | Atomic<br>Type | Coordinates (Angstroms) |           |           |
|------------------|------------------|----------------|-------------------------|-----------|-----------|
|                  |                  |                | X                       | Y         | Z         |
| 1                | 6                | 0              | -0.005875               | -0.003775 | 0.012185  |
| 2                | 6                | 0              | -0.016895               | 0.043891  | 1.407799  |
| 3                | 6                | 0              | 1.206177                | 0.085319  | 2.080251  |
| 4                | 6                | 0              | 2.430253                | 0.046259  | 1.409444  |
| 5                | 6                | 0              | 2.421234                | -0.001460 | 0.013831  |
| 6                | 6                | 0              | 1.208167                | -0.028652 | -0.681675 |
| 7                | 1                | 0              | -0.945812               | -0.019711 | -0.530890 |
| 8                | 1                | 0              | -0.947732               | 0.072787  | 1.963503  |
| 9                | 1                | 0              | 3.360307                | 0.077052  | 1.966360  |
| 10               | 1                | 0              | 3.361928                | -0.015652 | -0.527977 |
| 11               | 16               | 0              | 1.205099                | 0.082394  | 3.898441  |
| 12               | 8                | 0              | 2.507163                | 0.653295  | 4.348107  |
| 13               | 8                | 0              | -0.099452               | 0.648843  | 4.346514  |
| 14               | 1                | 0              | 1.208939                | -0.069020 | -1.766767 |

---

### p-Chlorophenyl sulfonyl radical.

Total Energy: -1239.81570375 a.u.

| Center<br>Number | Atomic<br>Number | Atomic<br>Type | Coordinates (Angstroms) |           |           |
|------------------|------------------|----------------|-------------------------|-----------|-----------|
|                  |                  |                | X                       | Y         | Z         |
| 1                | 6                | 0              | -0.011932               | 0.001051  | 0.011281  |
| 2                | 6                | 0              | -0.014310               | 0.045543  | 1.405135  |
| 3                | 6                | 0              | 1.206174                | 0.085855  | 2.082250  |
| 4                | 6                | 0              | 2.427637                | 0.047766  | 1.406708  |
| 5                | 6                | 0              | 2.427196                | 0.003171  | 0.012881  |
| 6                | 6                | 0              | 1.208084                | -0.021499 | -0.670398 |
| 7                | 1                | 0              | -0.945096               | -0.013815 | -0.540625 |

|    |    |   |           |           |           |
|----|----|---|-----------|-----------|-----------|
| 8  | 1  | 0 | -0.948154 | 0.072838  | 1.955928  |
| 9  | 1  | 0 | 3.360768  | 0.076926  | 1.958623  |
| 10 | 1  | 0 | 3.361094  | -0.010143 | -0.537817 |
| 11 | 16 | 0 | 1.205262  | 0.077494  | 3.897229  |
| 12 | 8  | 0 | 2.508136  | 0.647135  | 4.344618  |
| 13 | 8  | 0 | -0.100538 | 0.641542  | 4.343175  |
| 14 | 17 | 0 | 1.209294  | -0.082405 | -2.419860 |

---

### **p-Fluorophenyl sulfonyl radical.**

Total Energy: -879.46239993 a.u.

| Center<br>Number | Atomic<br>Number | Atomic<br>Type | Coordinates (Angstroms) |           |           |
|------------------|------------------|----------------|-------------------------|-----------|-----------|
|                  |                  |                | X                       | Y         | Z         |
| 1                | 6                | 0              | -0.004477               | 0.262496  | -0.054123 |
| 2                | 6                | 0              | -0.050697               | 0.329010  | 1.338178  |
| 3                | 6                | 0              | 1.118173                | 0.091424  | 2.066316  |
| 4                | 6                | 0              | 2.340313                | -0.175052 | 1.442458  |
| 5                | 6                | 0              | 2.387310                | -0.241963 | 0.050452  |
| 6                | 6                | 0              | 1.214049                | -0.019154 | -0.665018 |
| 7                | 1                | 0              | -0.889465               | 0.421935  | -0.660058 |
| 8                | 1                | 0              | -0.982504               | 0.537142  | 1.852529  |
| 9                | 1                | 0              | 3.230289                | -0.351361 | 2.036533  |
| 10               | 1                | 0              | 3.308437                | -0.463342 | -0.477096 |
| 11               | 9                | 0              | 1.260058                | -0.081463 | -2.015260 |
| 12               | 16               | 0              | 1.071837                | 0.241340  | 3.873172  |
| 13               | 8                | 0              | -0.333124               | -0.007430 | 4.304190  |
| 14               | 8                | 0              | 2.216526                | -0.546147 | 4.414117  |

---

### **p-Cyanophenyl sulfonyl radical.**

Total Energy: -872.46288826 a.u.

| Center<br>Number | Atomic<br>Number | Atomic<br>Type | Coordinates (Angstroms) |           |           |
|------------------|------------------|----------------|-------------------------|-----------|-----------|
|                  |                  |                | X                       | Y         | Z         |
| 1                | 6                | 0              | -0.013319               | 0.013618  | -0.000141 |
| 2                | 6                | 0              | -0.016867               | 0.049048  | 1.392292  |
| 3                | 6                | 0              | 1.206148                | 0.082585  | 2.064779  |
| 4                | 6                | 0              | 2.430050                | 0.051431  | 1.393755  |
| 5                | 6                | 0              | 2.428264                | 0.015963  | 0.001332  |
| 6                | 6                | 0              | 1.207903                | -0.005086 | -0.697407 |
| 7                | 1                | 0              | -0.948387               | 0.002413  | -0.549493 |
| 8                | 1                | 0              | -0.948428               | 0.073631  | 1.946685  |
| 9                | 1                | 0              | 3.360918                | 0.077915  | 1.949226  |
| 10               | 1                | 0              | 3.364005                | 0.006506  | -0.546902 |
| 11               | 16               | 0              | 1.205196                | 0.065381  | 3.886223  |

|    |   |   |           |           |           |
|----|---|---|-----------|-----------|-----------|
| 12 | 8 | 0 | 2.508760  | 0.633271  | 4.330462  |
| 13 | 8 | 0 | -0.100640 | 0.629146  | 4.329031  |
| 14 | 6 | 0 | 1.208815  | -0.045897 | -2.132641 |
| 15 | 7 | 0 | 1.209584  | -0.079559 | -3.295457 |

---

**p-Nitrophenyl sulfonyl radical.**

Total Energy: -984.72647834 a.u.

---

| Center<br>Number | Atomic<br>Number | Atomic<br>Type | Coordinates (Angstroms) |           |           |
|------------------|------------------|----------------|-------------------------|-----------|-----------|
|                  |                  |                | X                       | Y         | Z         |
| 1                | 6                | 0              | 0.016126                | 0.410182  | -0.042183 |
| 2                | 6                | 0              | -0.013549               | 0.464177  | 1.350572  |
| 3                | 6                | 0              | 1.131130                | 0.095093  | 2.060067  |
| 4                | 6                | 0              | 2.312949                | -0.297737 | 1.428467  |
| 5                | 6                | 0              | 2.341273                | -0.351354 | 0.035673  |
| 6                | 6                | 0              | 1.193460                | 0.006181  | -0.671215 |
| 7                | 1                | 0              | -0.850280               | 0.672567  | -0.636514 |
| 8                | 1                | 0              | -0.913016               | 0.764144  | 1.876310  |
| 9                | 1                | 0              | 3.182020                | -0.576897 | 2.013452  |
| 10               | 1                | 0              | 3.229164                | -0.663657 | -0.499913 |
| 11               | 7                | 0              | 1.225472                | -0.047280 | -2.149670 |
| 12               | 8                | 0              | 2.273988                | -0.407174 | -2.682748 |
| 13               | 8                | 0              | 0.201879                | 0.272500  | -2.752217 |
| 14               | 16               | 0              | 1.112587                | 0.224741  | 3.879172  |
| 15               | 8                | 0              | -0.309331               | 0.120316  | 4.309386  |
| 16               | 8                | 0              | 2.169498                | -0.690528 | 4.392374  |

---
